# Supplementary material for: Pulsed Laser Deposition of Bismuth Vanadate Thin Films—The Effect of Oxygen Pressure on the Morphology, Composition, and Photoelectrochemical Performance
Source: PubMed Central journal article supplement (PMC7143622; doi:10.3390/ma13061360), 2020-03-17
Supplement: materials-13-01360-s001.pdf [file materials-13-01360-s001.pdf]

# Pulsed Laser Deposition of Bismuth Vanadate Thin Films—The Effect of Oxygen Pressure on the Morphology, Composition, and Photoelectrochemical Performance

Konrad Trzcíński, Mariusz Szkoda, Maria Gazda, Jakub Karczewski, Adam Cenian, Galina M. Grigorian and Mirosław Sawczak

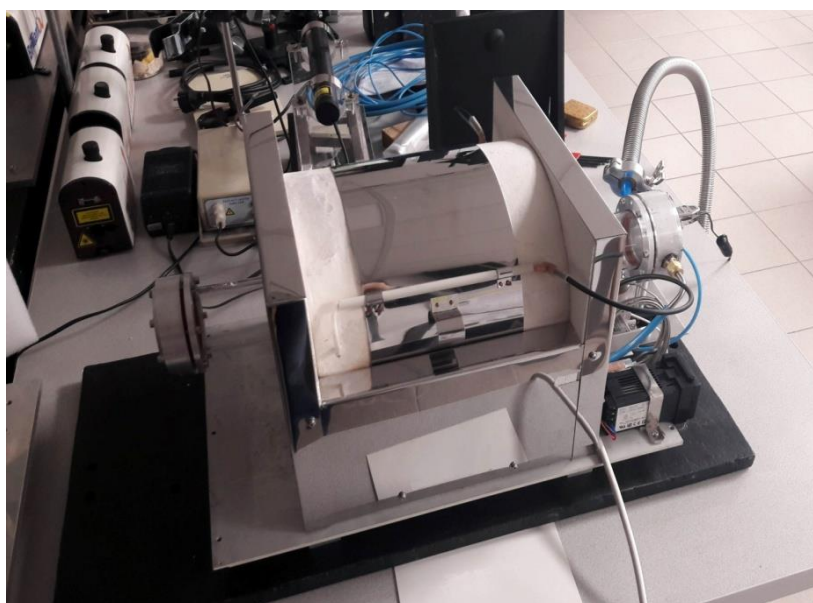

Figure S1. The self-made system for pulsed laser deposition.

Table S1. The variation of the film thickness depending on the oxygen pressure and the distance from the target.

| distance from the target | oxygen pressure |           |          |        |        |
|--------------------------|-----------------|-----------|----------|--------|--------|
|                          | 0.1 mbar        | 0.25 mbar | 0.5 mbar | 1 mbar | 2 mbar |
| 5 mm                     | 130 nm          | 150 nm    | 150 nm   | 130 nm | 130 nm |
| 7 mm                     | 160 nm          | 180 nm    | 170 nm   | 140 nm | 160 nm |
| 9 mm                     | 160 nm          | 180 nm    | 150 nm   | 160 nm | 160 nm |
| 11 mm                    | 160 nm          | 200 nm    | 160 nm   | 160 nm | 160 nm |
| 13 mm                    | 140 nm          | 180 nm    | 150 nm   | 140 nm | 160 nm |

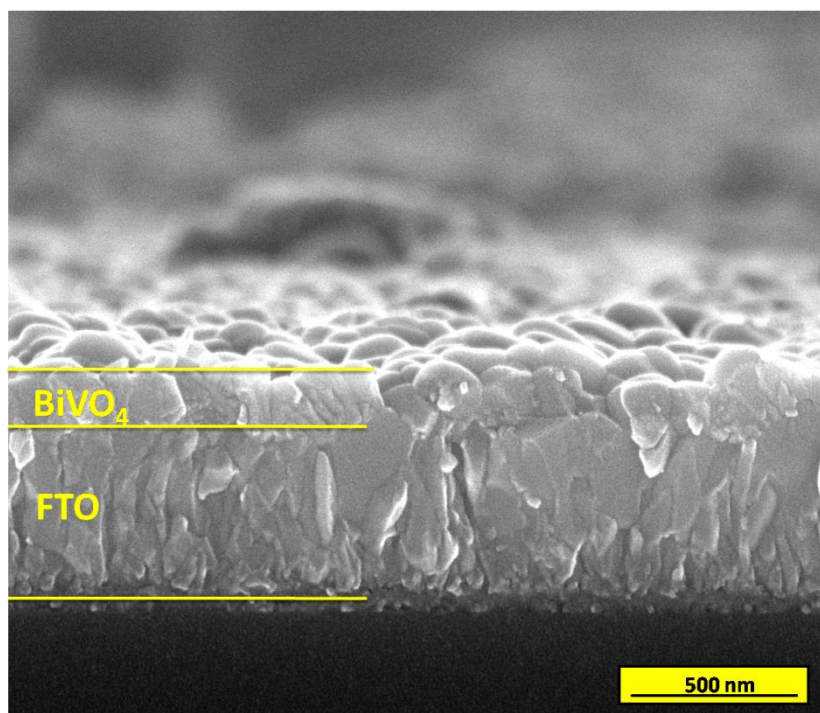

**Figure S2.** The exemplary cross-sectional SEM micrograph of the sample deposited under 0.1 mbar.

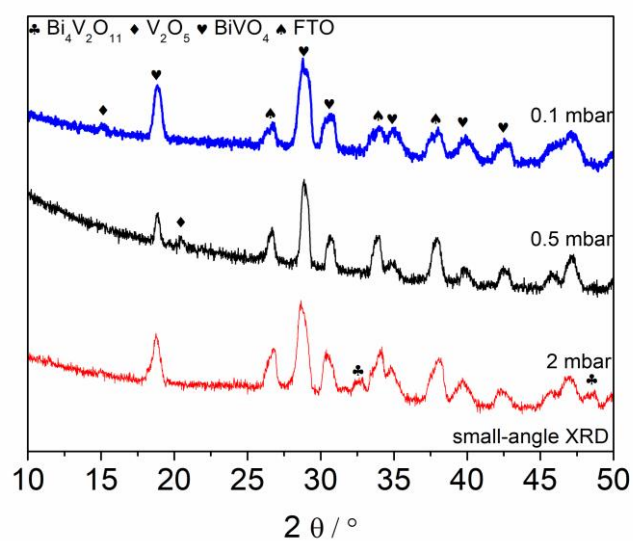

**Figure S3.** The exemplary small-angle XRD patterns of the samples deposited under 0.1, 0.5, and 2 mbar.

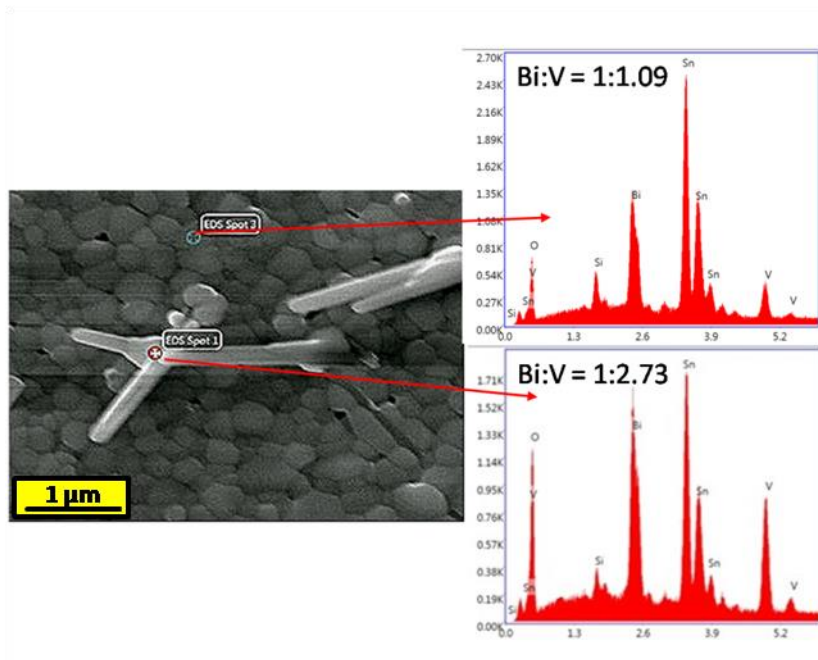

**Figure S4.** The EDX analysis of the  $V_2O_5$  crystals formed on the  $BiVO_4$  film deposited under 0.5 mbar.

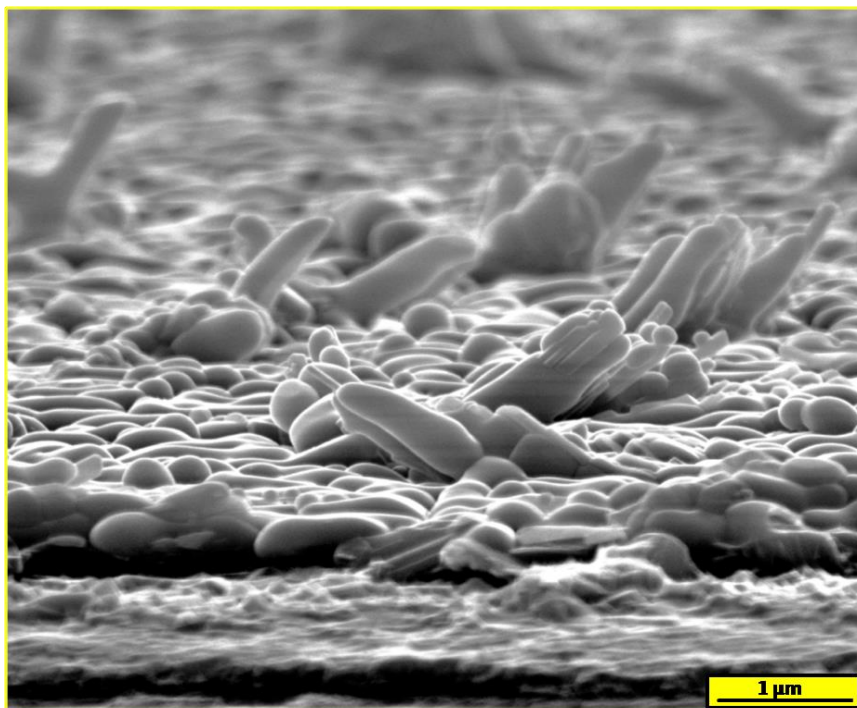

**Figure S5.** The cross-sectional SEM micrograph of the area rich in longitudinal crystallites.

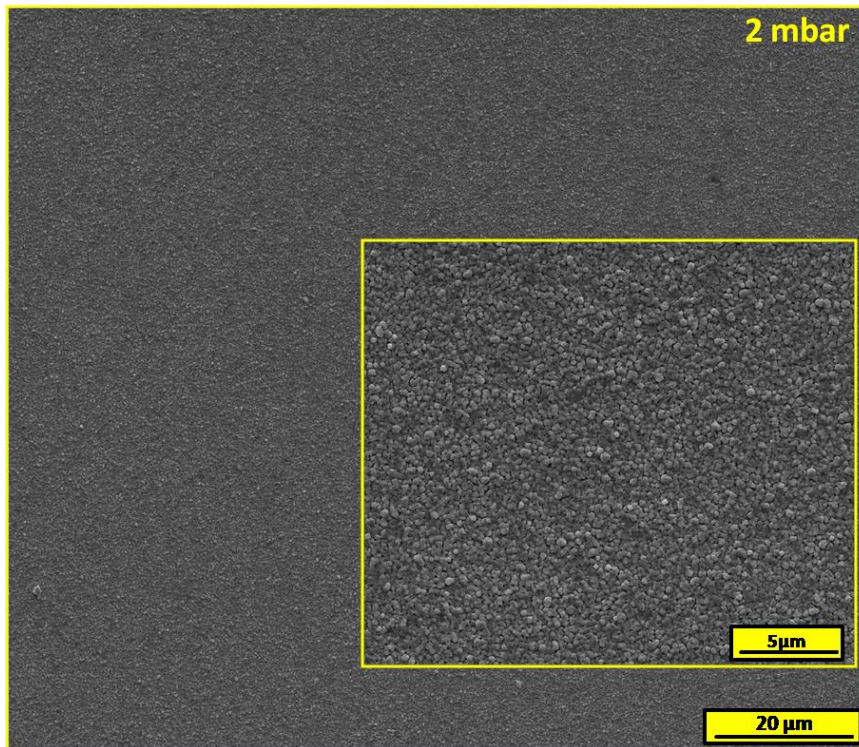

**Figure S6.** The SEM image of the sample deposited under 2 mbar.



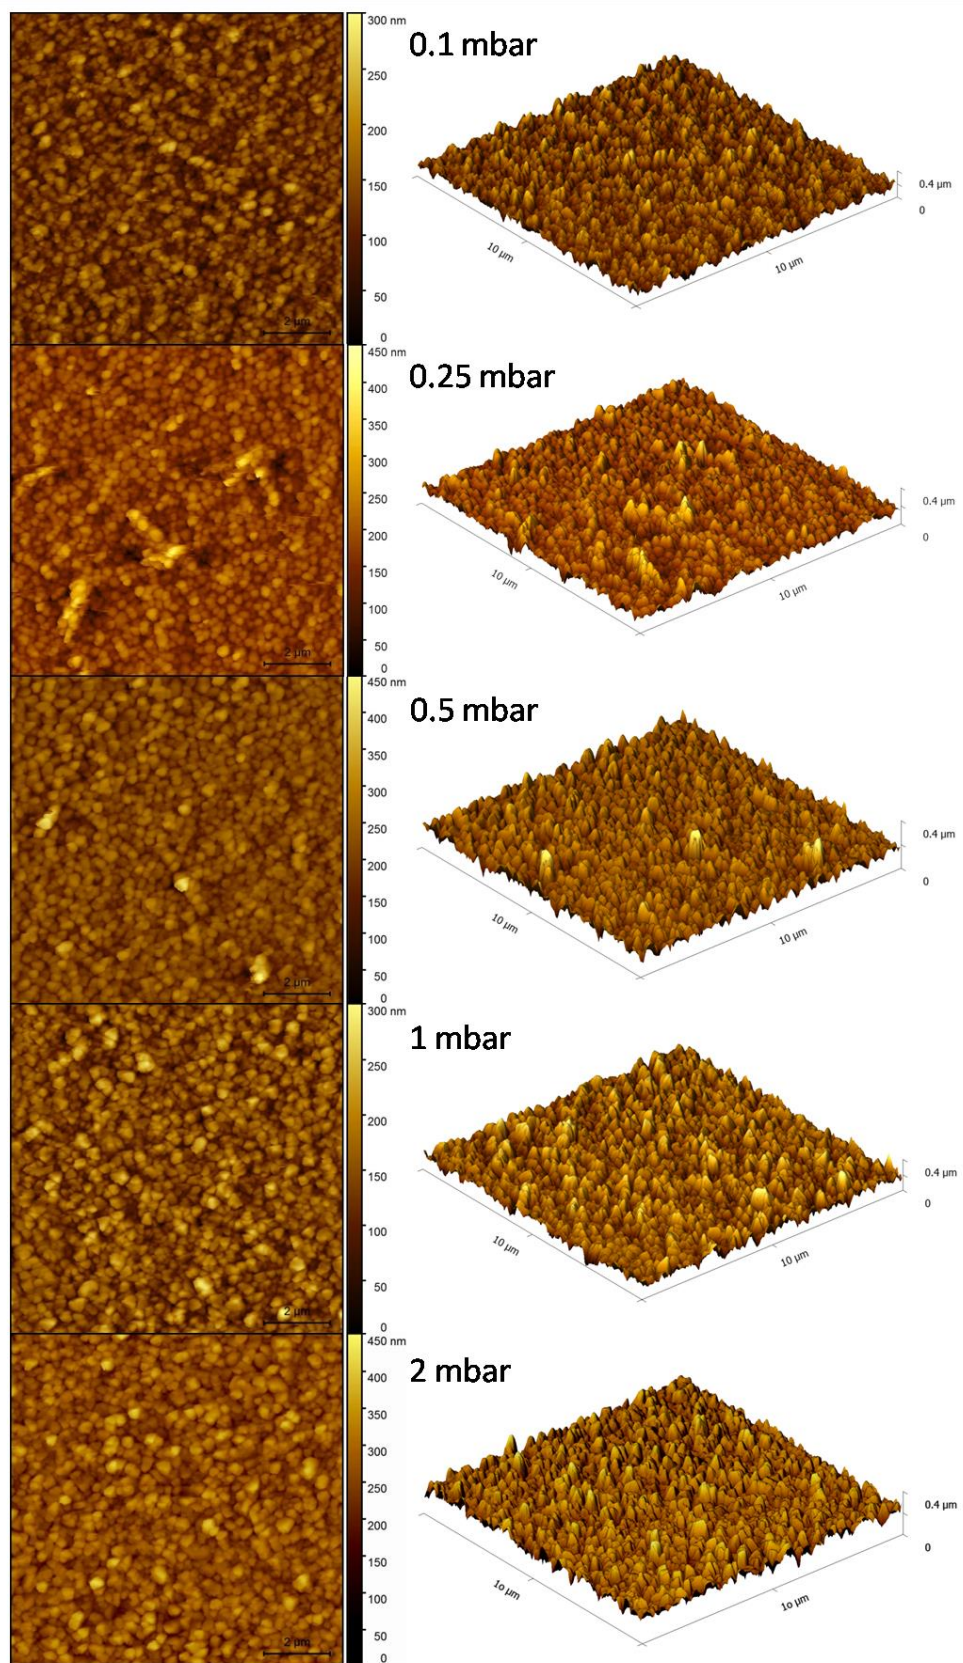

**Figure S7.** AFM topography of films deposited under 0.1, 0.25, 0.5, 1, and 2 mbar.
